# Supplementary material for: Enhanced ferroelectricity in NaNbO3–LaCoO3:Mn epitaxial thin film
Source: Royal Society of Chemistry journal article supplement (doi:10.1039/d1qi01041g), 2021-01-01
Supplement: d1qi01041g1.pdf [file d1qi01041g1.pdf]

## Supporting Information:

### Enhanced ferroelectricity in $\text{NaNbO}_3\text{-LaCoO}_3\text{:Mn}$ epitaxial thin film

Mingdi Yang,<sup>1</sup> Shan Li,<sup>1</sup> Yilin Wang,<sup>1,2</sup> He Qi,<sup>3</sup> Kun Lin,<sup>1</sup> Qiang Li,<sup>1</sup> and Xianran Xing<sup>1,\*</sup>

<sup>1</sup> *Beijing Advanced Innovation Center for Materials Genome Engineering, Institute of Solid State Chemistry, Department of Physical Chemistry, University of Science and Technology Beijing, Beijing 100083, China*

<sup>2</sup> *Institute of Advanced Materials (IAM), Jiangsu National Synergetic Innovation Center for Advanced Materials (SICAM), Nanjing Tech University, 30 South Puzhu Road, Nanjing 211816, China*

<sup>3</sup> *Department of Physical Chemistry, University of Science and Technology Beijing, Beijing 100083, China*

\*Corresponding author: [xing@ustb.edu.cn](mailto:xing@ustb.edu.cn)

## Contents

|                       |    |
|-----------------------|----|
| I. Experiment Section | S2 |
| II. Figures           | S4 |
| References            | S8 |

## **Experimental section:**

### **Target preparation and thin film growth:**

$\text{Na}_2\text{CO}_3$ ,  $\text{Nb}_2\text{O}_5$ , and  $\text{MnO}_2$  powders were mixed to prepare  $\text{NaNb}_{0.95}\text{Mn}_{0.05}\text{O}_3$  ceramic.  $\text{Na}_2\text{CO}_3$  and  $\text{Nb}_2\text{O}_5$  powders were mixed to prepare  $\text{NaNbO}_3$  ceramic. Then calcined these powders at  $850^\circ\text{C}$  for 3h. Next, the powders were pressed into 60 mm diameter disk at 30MPa using polyvinyl alcohol (PVA) as the binder and sintered at  $750^\circ\text{C}$  for 2 h. For the  $\text{LaCoO}_3$  target,  $\text{La}_2\text{O}_3$  and  $\text{Co}_3\text{O}_4$  were mixed and calcined at  $1200^\circ\text{C}$  for 10h. Then these powders were also pressed into 60 mm diameter disk at 30MPa using PVA and sintered at  $1000^\circ\text{C}$  for 3 h.

The epitaxial thin film was deposited by RF sputtering on (001)  $\text{LaAlO}_3$  substrates at  $600^\circ\text{C}$ . The pressure is 1.5 Pa with Ar and  $\text{O}_2$ . By controlling the sputtering power, we can get thin films with different La and Co contents. And the optimal power is 12W of  $\text{LaCoO}_3$  target and 112W of  $\text{NaNbO}_3\text{:Mn}$  target. Before the deposition of the NNO thin film, a buffer layer of  $\text{SrRuO}_3$  (SRO) was first sputtered at  $680^\circ\text{C}$  as the bottom electrode. And the pressure is also 1.5 Pa with Ar and  $\text{O}_2$ . Mask with  $100\mu\text{m}$  holes was used to deposited Pt top electrode.

### **Characterization:**

The  $\theta$ - $2\theta$  X-ray diffraction (XRD) at room temperature, phi scan, and reciprocal space mapping (RSM) were collected at the diffuse X-ray scattering station of the Beijing Synchrotron Radiation Facility (1W1A beamline). The high temperature XRD was measured by a powder diffractometer (X'Pert(III), PANalytical,  $\lambda = 1.5406 \text{ \AA}$ ). The rocking curve was collected by a single crystal diffractometer (Bruker AXS GmbH).

The ferroelectric  $P$ - $E$  hysteresis loops,  $I$ - $V$  loops,  $J$ - $V$  curves, and fatigue tests were measured using a ferroelectric tester (TF-Analyzer 1000, aixACCT, Germany). The dielectric constant as a function of temperature was collected by an impedance analyzer (4294, Hewlett Packard) connected with a high temperature probe system (HFS600E-PB2, Linkam, UK).

The X-ray absorption spectra were measured at the photoelectron spectroscopy

station of the Beijing Synchrotron Radiation Facility (4B9B beamline). The X-ray photoelectron spectroscopy (XPS) were collected using a spectroscopy spectrometer (Thermo ESCALAB 250XI).

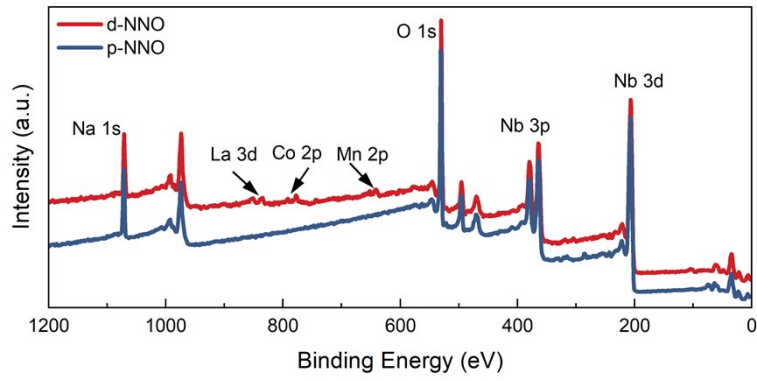

Fig.S1 XPS of the p-NNO and d-NNO thin films with all the major peaks indicated.

Compared with the p-NNO, the peaks appeared at 641 and 652, 780 and 792, 836 and 850 eV in the d-NNO thin film are ascribed to the Mn 2p, Co 2p and La 3d<sup>1,2,3</sup>, proving the presence of these elements in d-NNO thin film.

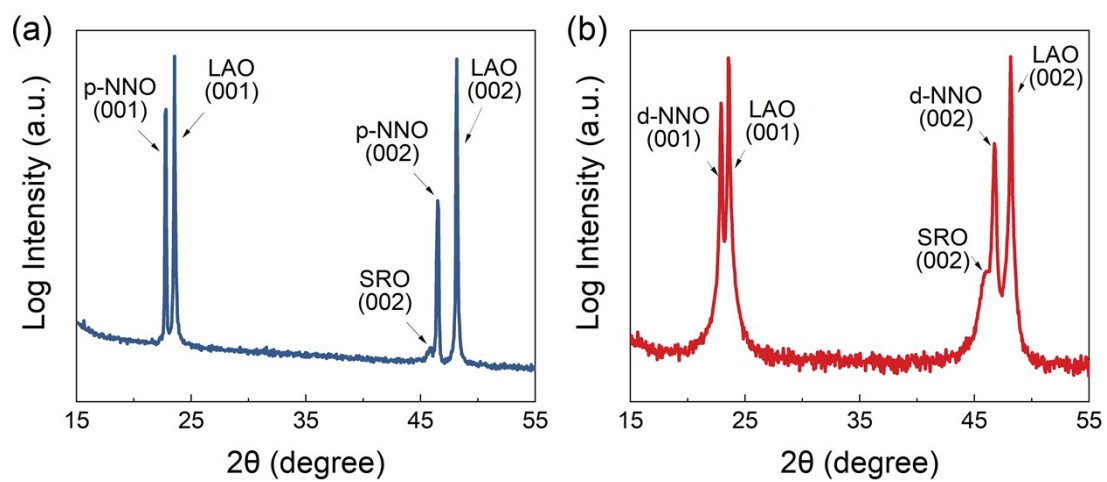

Fig.S2 Out-of-plane XRD patterns of the p-NNO (a) and d-NNO (b) thin films.

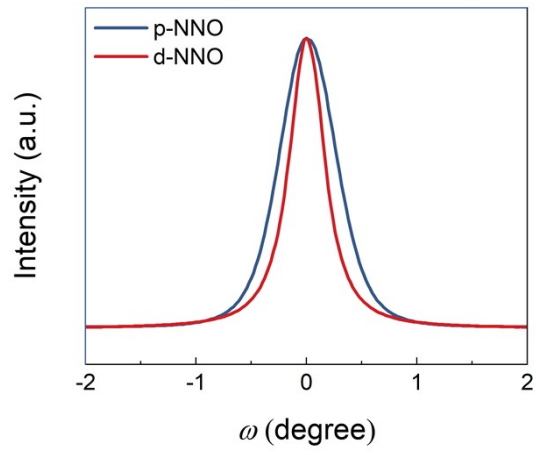

Fig.S3 Rocking curves of p-NNO and d-NNO thin films.

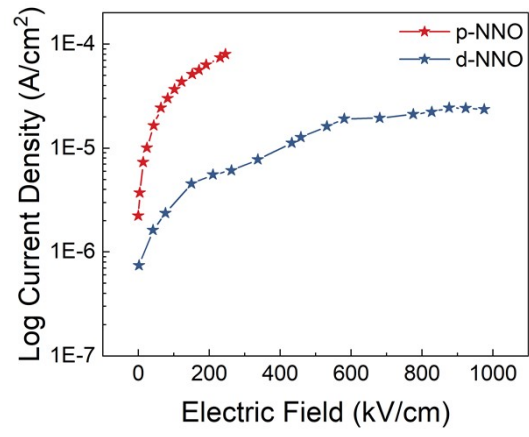

Fig.S4 Leakage current density as a function of electric field for p-NNO and d-NNO thin films.

## References:

---

- 1 M. S. J. Marshall, D. T. Newell, D. J. Payne, R. G. Egdell and M. R. Castell, Atomic and electronic surface structures of dopants in oxides: STM and XPS of Nb- and La-doped SrTiO<sub>3</sub>(001), *Phys. Rev. B*, 2011, **83**, 035410.
- 2 M. Zhi, G. Zhou, Z. Hong, J. Wang, R. Gemmen, K. Gerdes, A. Manivannan, D. Ma and N. Wu, Single crystalline La<sub>0.5</sub>Sr<sub>0.5</sub>MnO<sub>3</sub> microcubes as cathode of solid oxide fuel cell, *Energy Environ. Sci.*, 2011, 4, 139-144.
- 3 J. Qian, T. Wang, Z. Zhang, Y. Liu, J. Li and D. Gao, Engineered spin state in Ce doped LaCoO<sub>3</sub> with enhanced electrocatalytic activity for rechargeable Zn-Air batteries, *Nano Energy*, 2020, **74**, 104948.
